# Supplementary material
Source: publisher figshare collection journal article supplement (https://acs.figshare.com/ndownloader/files/4220986)
Supplement: Supplementary file 1 [file 4220986]

## Supporting Information

### Toward *In vivo* Imaging of Heart Disease Using a Radiolabeled Single-Chain Fv Fragment Targeting Tenascin-C

Norihiro Kobayashi,<sup>a,\*</sup> Kenichi Odaka,<sup>b</sup> Tomoya Uehara,<sup>c</sup> Kyoko Imanaka-Yoshida,<sup>d,e</sup> Yoshinori Kato,<sup>a</sup> Hiroyuki Oyama,<sup>a</sup> Hiroyuki Tadokoro,<sup>f</sup> Hiromichi Akizawa,<sup>c</sup> Shuji Tanada,<sup>g</sup> Michiaki Hiroe,<sup>h</sup> Toshimitsu Fukumura,<sup>b</sup> Issei Komuro,<sup>i</sup> Yasushi Arano,<sup>c</sup> Toshimichi Yoshida,<sup>d,e</sup> Toshiaki Irie<sup>b</sup>

<sup>a</sup> Kobe Pharmaceutical University, 4-19-1, Motoyama-Kitamachi, Higashinada-ku, Kobe 658-8558, Japan, <sup>b</sup> Molecular Imaging Center, National Institute of Radiological Sciences, 4-9-1, Anagawa, Inage-ku, Chiba 263-8555, Japan, <sup>c</sup> Graduate School of Pharmaceutical Sciences, Chiba University, 1-8-1, Inohana, Chuo-ku, Chiba 260-8675 Japan, <sup>d</sup> Mie University Matrix Biology Research Center, 2-174, Edobashi, Tsu 514-8507, Japan, <sup>e</sup> Department of Pathology and Matrix Biology, Graduate School of Medicine, Mie University, 2-174, Edobashi, Tsu 514-8507, Japan, <sup>f</sup> Department of Bio-Medical Engineering, Tokai University, 317, Nishino, Numazu 410-0395, Japan, <sup>g</sup> Department of Radiation Oncology and Nuclear Medicine, International University of Health and Welfare, Mita Hospital, 1-4-3, Mita, Minato-ku, Tokyo 108-8329, Japan, <sup>h</sup> Department of Cardiology, National Center for Global Health and Medicine, 1-21-1, Toyama, Shinjuku-ku, Tokyo 162-8655, Japan, <sup>i</sup> Department of Cardiovascular Medicine, Osaka University Graduate School of Medicine, 2-2, Yamadaoka, Suita, Osaka 565-0871, Japan.

---

### Supplementary Experimental Procedures

**Buffers.** PBS: 50 mM sodium phosphate buffer (pH 7.3) containing 9.0 g/L NaCl; M-PBS: PBS containing 20 g/L skim milk; G-PBS: PBS containing 1.0 g/L gelatin; T-PBS: PBS containing 0.050 (v/v) % Tween 20.

**ELISA for Detection and Characterization of ScFv-4F10 (Figure 3A in the text).** Microwells in 96-well microplates (no. 3590) (Costar) were coated with a solution of a Tnc (prepared and purified as reported previously)<sup>1</sup> (10 µg/mL) in 0.10 M carbonate buffer (pH 8.6) (100 µL/well) overnight at 4°C. After washing 3 times with PBS, the wells were blocked with M-PBS at 37°C for 1 h. The wells were washed again, and then crude periplasmic extract or purified scFv-4F10 protein, diluted with G-PBS (100 µL/well), was added along with free Tnc dissolved in G-PBS (100 µL/well). After the solutions were mixed and incubated at 37°C for 1 h, they were aspirated off and the wells were washed 3 times with T-PBS. Next, anti-FLAG M2 antibody (Sigma), diluted with G-PBS (5.0 µg/mL) (100 µL/well), was added and incubated at 37°C for 1 h. The wells were washed and horseradish peroxidase (POD)-conjugated rabbit anti-mouse IgG antibody (Fc-specific) (Jackson ImmunoResearch), diluted with G-PBS (100 µL/well), was added and incubated at 37°C for 1 h. Following washing, the bound POD activity in each well was determined colorimetrically using *o*-phenylenediamine as the hydrogen donor.<sup>2,3</sup>

**Determination of Binding Affinity and Kinetics of ScFv-4F10 to Tnc.** Surface plasmon resonance (SPR) analysis was performed using a Biacore 2000 (Biacore) to determine the association and dissociation rate constants ( $k_a$  and  $k_d$ ) of scFv-4F10. Five different concentrations of scFv (54, 107, 214,

428, 857 nM), diluted in 50 mM phosphate-buffered saline (pH 7.3) containing 0.15 M NaCl, and 0.020% gelatin, were applied to a flow cell equipped with a sensor tip that immobilized the Tnc, followed by washing with the same buffer. The flow rate of the solutions was set at 20  $\mu$ L/min.

**Synthesis of 1-[4-(5-maleimidopentyl)amidobenzyl]diethylenetriaminepentaacetic acid (EMCS-Bz-DTPA).**<sup>4</sup> To a chilled ( $-15^{\circ}\text{C}$ ) solution of *N*-(carboxypentyl)maleimide<sup>5</sup> (282 mg, 1.34 mmol) in tetrahydrofuran (THF, 1 mL) was added *N*-methylmorpholine (135 mg, 1.34 mmol) and isobutyl chloroformate (183 mg, 1.34 mmol) at the same temperature. After 2 min, a THF solution (1 mL) of *N,N,N',N'',N'''*-pentakis[(*tert*-butylcarbonyl)methyl]-1-[(4-aminophenyl)methyl]diethylenetriamine [NH<sub>2</sub>-Bz-DTPA(tBu)<sub>5</sub>]<sup>6</sup> (950 mg, 1.22 mmol) was added. The reaction mixture was stirred for 30 min at  $-15^{\circ}\text{C}$  and for 2 h at room temperature. After removing the solvent *in vacuo*, the residue was purified by column chromatography on silica gel using a mixture of ethyl acetate and hexane (1:1) as an eluent, to produce EMCS-Bz-DTPA(tBu)<sub>5</sub> (355 mg, 30 %).

EMCS-Bz-DTPA(tBu)<sub>5</sub> (117 mg, 0.12 mmol) was treated with a mixture of trifluoroacetic acid (1.9 mL) and anisole (0.1 mL) for 3 h. After removing the solvent, diethyl ether was added to precipitate EMCS-Bz-DTPA as a pale yellow solid (77 mg, 93%). <sup>1</sup>H-NMR (DMSO):  $\delta$  1.21-1.25 (2H, q,  $J = 6.8$  Hz, CH<sub>2</sub>), 1.48-1.58 (4H, m, CH<sub>2</sub>), 2.23-2.26 (2H, t,  $J = 7.2$  Hz, NHCO-CH<sub>2</sub>), 2.43-2.95 (8H, m, N-CH<sub>2</sub>, Bz-CH<sub>2</sub>), 3.12-3.58 (13H, m, CH<sub>2</sub>-COO, CH, CH<sub>2</sub>-N-maleimide), 6.99 (2H, s, maleimide), 7.10-7.13 (2H, d,  $J = 8.4$  Hz, aromatic), 7.46-7.48 (2H, d,  $J = 8.4$  Hz, aromatic), 9.77 (1H, s, NH). FAB-MS:  $m/z$  692 (M+H)<sup>+</sup>.

**Determination of reactive SH groups in scFv-Cys molecules before and after DTPA conjugation (Figure 4A in the text).** ScFv-Cys was biotinylated with a reagent that contains a maleimide group (Biotin Labeling Kit-SH; Dojindo Molecular Technologies), and the product (~50 ng) in G-PBS (100  $\mu$ L) was incubated at  $37^{\circ}\text{C}$  for 1 h in the microwells coated with Tnc (1.0  $\mu$ g/well). After washing the wells 3 times with T-PBS, the POD-conjugated streptavidin (0.010  $\mu$ g) in T-PBS (100  $\mu$ L) was incubated in the wells at  $37^{\circ}\text{C}$  for 1 h. The wells were washed similarly and the bound POD activity was measured as described above over the course of a 10-min reaction.

**Comparison of the binding activity to Tnc between the scFv-Cys and scFv-DTPA (Figure 4B in the text).** ScFv-Cys and scFv-DTPA (each 200 ng) in G-PBS (100  $\mu$ L) were incubated at  $37^{\circ}\text{C}$  for 1 h in the microwells coated with Tnc (1.0  $\mu$ g/well). After washing the wells 3 times with T-PBS, POD-conjugated anti-FLAG M2 antibody (0.50  $\mu$ g) in T-PBS (100  $\mu$ L) was incubated in the wells at  $37^{\circ}\text{C}$  for 1 h. The wells were washed and the bound POD activity was determined as described above.

---

**Table S1. Nucleotide sequences of PCR primers used in this study.**

| Primer                     | Sequence (5'→3'; Restriction site <sup>a</sup> )                                                         |
|----------------------------|----------------------------------------------------------------------------------------------------------|
| V <sub>L</sub> -IIa        | GATGTTKTGATGACCCAACT                                                                                     |
| V <sub>L</sub> -IIa-ext    | ACTAGTCGACGATRTTKTGATRACCCA ( <i>Sal</i> I)                                                              |
| V <sub>L</sub> -For (CDR3) | GGATCCCGGGCGGAAAATGTGTAGTTTGCAC ( <i>Xma</i> I)                                                          |
| V <sub>H</sub> -Rev1       | ATTGTTATTACTCGCGGCCCAACCGGCCATGGCCGAGGTCCTGCTGCAACAGTC ( <i>Sfi</i> I)                                   |
| V <sub>H</sub> -For1       | CCGCCGGATCCACCTCCGCCTGAACCGCCTCCACCTGCAGAGACAGAGACCAGAG                                                  |
| V <sub>L</sub> -Rev1       | CAGGCGGAGGTGGATCCGGCGGTGGCGGATCGGATGTTTTGATGACCCAACTC                                                    |
| V <sub>L</sub> -For1       | GCTCAACTTTCTTGTCTGACTTTATCATCATCATCTTTATAATCTTTGATTTCCAGCTTGGTGC<br>( <i>Sal</i> I)                      |
| V <sub>L</sub> -For2       | GCTCAAACTTTCTTGTCTGACTTATCAGCATGCTCCGCCCGCACGTTTGATTTCCAGTTTGGTT<br>TTATCATCATCATCTTTATA ( <i>Sal</i> I) |

<sup>a</sup> Underlined in the nucleotide sequences

### V<sub>H</sub>-sequence

|                        |            |            |            |            |            |            |            |            |            |            |            |                                          |            |            |                                                     |            |            |            |     |
|------------------------|------------|------------|------------|------------|------------|------------|------------|------------|------------|------------|------------|------------------------------------------|------------|------------|-----------------------------------------------------|------------|------------|------------|-----|
| 4F10-cDNA<br>Cloned VH | GAG        | GTC        | CTG        | CTG        | CAA        | CAG        | TCT        | GGA        | CCT        | GAG        | CTG        | GTG                                      | AAG        | CCT        | GGG                                                 | GCT        | TCA        | GTG        |     |
|                        | E          | V          | L          | L          | Q          | Q          | S          | G          | P          | E          | L          | V                                        | K          | P          | G                                                   | A          | S          | V          |     |
| 4F10-cDNA<br>Cloned VH | AAG        | ATA        | CCC        | TGC        | AAG        | GCT        | TCT        | GGA        | TAC        | ACA        | TTC        | ACT                                      | <b>GAC</b> | <b>TAC</b> | CDR1<br><b>AAC</b> <b>ATG</b> <b>GAC</b>            |            |            |            | TGG |
|                        | K          | I          | P          | C          | K          | A          | S          | G          | Y          | T          | F          | T                                        | <b>D</b>   | <b>Y</b>   | <b>N</b>                                            | <b>N</b>   | <b>D</b>   | <b>W</b>   |     |
| 4F10-cDNA<br>Cloned VH | ATG        | AAG        | CAG        | AGC        | CAT        | GGA        | AAG        | AGC        | CTT        | GAG        | TGG        | ATT                                      | GGA        | <b>GAT</b> | CDR2<br><b>ATT</b> <b>AAT</b> <b>CCT</b> <b>AAG</b> |            |            |            |     |
|                        | M          | K          | Q          | S          | H          | G          | K          | S          | L          | E          | W          | I                                        | G          | <b>D</b>   | <b>I</b>                                            | <b>N</b>   | <b>P</b>   | <b>K</b>   |     |
| 4F10-cDNA<br>Cloned VH | <b>AGT</b> | <b>GGT</b> | <b>AAT</b> | <b>TCC</b> | <b>ATC</b> | <b>TAC</b> | <b>AAC</b> | <b>CAG</b> | <b>AAG</b> | <b>TTC</b> | <b>AAG</b> | <b>GGC</b>                               | AAG        | GCC        | ACA                                                 | CTG        | ACT        | GTA        |     |
|                        | <b>S</b>   | <b>G</b>   | <b>N</b>   | <b>S</b>   | <b>I</b>   | <b>Y</b>   | <b>N</b>   | <b>Q</b>   | <b>K</b>   | <b>F</b>   | <b>K</b>   | <b>G</b>                                 | K          | A          | T                                                   | L          | T          | V          |     |
| 4F10-cDNA<br>Cloned VH | GAC        | AAG        | TCC        | TCC        | AGC        | ACA        | GCC        | TAC        | ATG        | GAG        | CTC        | CGC                                      | AGC        | CTG        | ACA                                                 | TCT        | GAG        | GAC        |     |
|                        | D          | K          | S          | S          | S          | T          | A          | Y          | M          | E          | L          | R                                        | S          | L          | T                                                   | S          | E          | D          |     |
| 4F10-cDNA<br>Cloned VH | ACT        | GCA        | GTC        | TAT        | TAC        | TGT        | GCA        | GGG        | <b>CGG</b> | <b>GAC</b> | <b>TGG</b> | CDR3<br><b>TCT</b> <b>GCC</b> <b>TGG</b> |            |            |                                                     | <b>TTT</b> | <b>GCT</b> | <b>TTC</b> | TGG |
|                        | T          | A          | V          | Y          | Y          | C          | A          | G          | <b>R</b>   | <b>D</b>   | <b>N</b>   | <b>S</b>                                 | <b>A</b>   | <b>N</b>   | <b>F</b>                                            | <b>A</b>   | <b>F</b>   | <b>W</b>   |     |
| 4F10-cDNA<br>Cloned VH | GGC        | CAA        | GGG        | ACT        | CTG        | GTC        | TCT        | GTC        | TCT        | GCA        |            |                                          |            |            |                                                     |            |            |            |     |
|                        | G          | Q          | G          | T          | L          | V          | S          | V          | S          | A          |            |                                          |            |            |                                                     |            |            |            |     |

### V<sub>L</sub>-sequence

|                        |            |            |            |            |            |            |            |            |            |            |            |            |            |            |            |            |            |            |
|------------------------|------------|------------|------------|------------|------------|------------|------------|------------|------------|------------|------------|------------|------------|------------|------------|------------|------------|------------|
| 4F10-cDNA<br>Cloned VL | GAT        | GTT        | GTG        | ATG        | ACC        | CAG        | ACT        | CCA        | CTC        | ACT        | TTG        | TCG        | GTT        | ATC        | ATT        | GGA        | CAA        | CCA        |
|                        | D          | V          | L          | M          | T          | Q          | T          | P          | L          | T          | L          | S          | V          | I          | I          | G          | Q          | P          |
|                        | -          | -          | -          | -          | -          | -          | -          | -          | -          | -          | -          | -          | -          | -          | -          | -          | -          | -          |
| 4F10-cDNA<br>Cloned VL | GCC        | TCT        | ATC        | TCT        | TGC        | <b>AAG</b> | <b>TCA</b> | <b>AGT</b> | <b>CAG</b> | <b>AGC</b> | <b>CTC</b> | <b>CTA</b> | <b>TAT</b> | <b>AGT</b> | <b>AAC</b> | <b>GGA</b> | <b>AAA</b> | <b>ACC</b> |
|                        | A          | S          | I          | S          | C          | <b>K</b>   | <b>S</b>   | <b>S</b>   | <b>Q</b>   | <b>S</b>   | <b>L</b>   | <b>L</b>   | <b>Y</b>   | <b>S</b>   | <b>N</b>   | <b>G</b>   | <b>K</b>   | <b>T</b>   |
|                        | -          | -          | -          | -          | -          | -          | -          | -          | -          | -          | -          | -          | -          | -          | -          | -          | -          | -          |
| 4F10-cDNA<br>Cloned VL | <b>TAT</b> | <b>TGG</b> | <b>AAT</b> | TGG        | TTA        | TTA        | CAG        | AGG        | CCA        | GGC        | CAG        | TCT        | CCA        | AAG        | CGA        | CTA        | ATC        | TAT        |
|                        | <b>Y</b>   | <b>L</b>   | <b>N</b>   | W          | L          | L          | Q          | R          | P          | G          | Q          | S          | P          | K          | R          | L          | I          | Y          |
|                        | -          | -          | -          | -          | -          | -          | -          | -          | -          | -          | -          | -          | -          | -          | -          | -          | -          | -          |
| 4F10-cDNA<br>Cloned VL | <b>CTG</b> | <b>GTG</b> | <b>TCT</b> | <b>AAA</b> | <b>CTG</b> | <b>GAC</b> | <b>TCT</b> | GGA        | GTC        | CCT        | GAC        | AGG        | TTC        | ACT        | GGC        | AGT        | GGA        | TCA        |
|                        | <b>L</b>   | <b>V</b>   | <b>S</b>   | <b>K</b>   | <b>L</b>   | <b>D</b>   | <b>S</b>   | G          | V          | P          | D          | R          | F          | T          | G          | S          | G          | S          |
|                        | -          | -          | -          | -          | -          | -          | -          | -          | -          | -          | -          | -          | -          | -          | -          | -          | -          | -          |
| 4F10-cDNA<br>Cloned VL | GGA        | ACA        | GAT        | TTT        | ACA        | CTG        | AAA        | ATC        | AGC        | AGA        | GTG        | GAG        | GCT        | GAG        | GAT        | TTG        | GGA        | GAT        |
|                        | G          | T          | D          | F          | T          | L          | K          | I          | S          | R          | V          | E          | A          | E          | D          | L          | G          | D          |
|                        | -          | -          | -          | -          | -          | -          | -          | -          | -          | -          | -          | -          | -          | -          | -          | -          | -          | -          |
| 4F10-cDNA<br>Cloned VL | TAT        | TAC        | TGT        | <b>GTG</b> | <b>CAA</b> | <b>ACT</b> | <b>ACA</b> | <b>CAT</b> | <b>TTT</b> | <b>CCG</b> | <b>TGG</b> | <b>ACG</b> | TTC        | GGT        | GGA        | GGC        | ACC        | AAG        |
|                        | Y          | Y          | C          | <b>V</b>   | <b>Q</b>   | <b>T</b>   | <b>T</b>   | <b>N</b>   | <b>F</b>   | <b>P</b>   | <b>N</b>   | <b>T</b>   | F          | G          | G          | G          | T          | K          |
|                        | -          | -          | -          | -          | -          | -          | -          | -          | -          | -          | -          | -          | -          | -          | -          | -          | -          | -          |
| 4F10-cDNA<br>Cloned VL | CTG        | GAA        | ATC        | AAA        |            |            |            |            |            |            |            |            |            |            |            |            |            |            |
|                        | L          | E          | I          | K          |            |            |            |            |            |            |            |            |            |            |            |            |            |            |
|                        | -          | -          | -          | -          | D          | Y          | K          | D          | D          | D          | D          | K          |            |            |            |            |            |            |

### Linker sequence

|     |     |     |     |     |     |     |     |     |     |     |     |     |     |     |
|-----|-----|-----|-----|-----|-----|-----|-----|-----|-----|-----|-----|-----|-----|-----|
| GGT | GGA | GGC | GGT | TCA | GGC | GGA | GGT | GGA | TCC | GGC | GGT | GGC | GGA | TCG |
| G   | G   | G   | G   | S   | G   | G   | G   | G   | S   | G   | G   | G   | G   | S   |

**Figure S1. Nucleotide and amino acid sequences of the V<sub>H</sub> and V<sub>L</sub> domains of the anti-Tnc antibody 4F10.**

The upper and lower lines show the sequences of the cDNA and the scFv-4F10 construct, respectively. One silent mutation and one missense (Val3Leu) mutation were introduced in V<sub>L</sub> of scFv-4F10, due to the use of degenerate primer in the PCR cloning steps. The complementarity-determining regions (CDRs)<sup>7</sup> are shown in bold italic letters. The sequence of the linker that connects V<sub>H</sub> and V<sub>L</sub> is also shown.

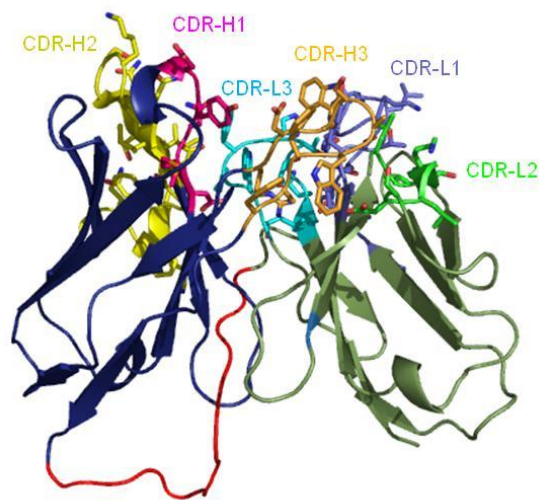

**Figure S2. Protein modeling of scFv-4F10.**

The protein ribbon structures of scFv-4F10 was generated using the SWISS-MODEL software.<sup>8</sup> The  $\beta$ -sheet structures consisting of the amino acids of the framework regions (FRs) are drawn by bold arrows (dark blue and dark green arrows for  $V_H$  and  $V_L$ , respectively). Amino acid residues forming the CDRs<sup>7</sup> (CDR-H1, -H2, -H3 in the  $V_H$  domain and CDR-L1, -L2, -L3 in the  $V_L$  domain) are indicated. The linker peptide is shown in red. This model structure has the characteristic V-domain architecture, *i.e.*, the CDR-composing amino acids form flexible loops that are raised above the surface of the rigid  $\beta$ -sheet scaffold.

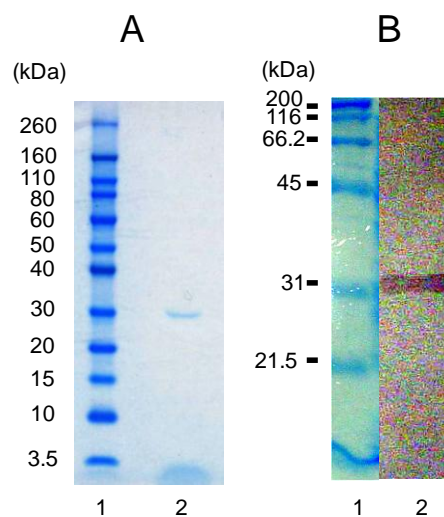

**Figure S3. PAGE of scFv-4F10.**

(A) SDS-PAGE of affinity-purified scFv-4F10 (Coomassie brilliant blue staining): lane **1**,  $M_r$  marker; **2**, scFv. (B) Immunoblotting of the affinity-purified scFv-4F10: lane **1**,  $M_r$  marker; **2**, scFv. The scFv was detected by sequential incubation with anti-FLAG M2 antibody followed by POD-conjugated rabbit anti-mouse IgG Fc-specific antibody. Bound POD activity was visualized using hydrogen peroxide and 4-chloro-1-naphthol as substrates.

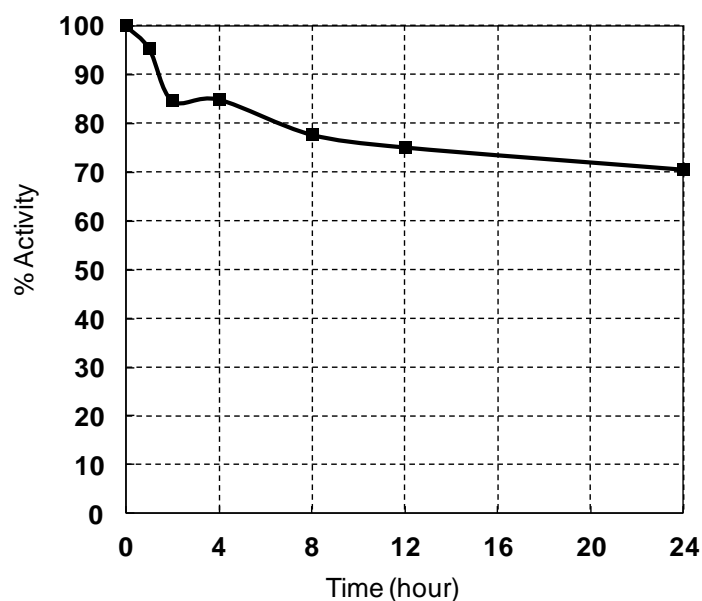

**Figure S4. Retention of the binding activity of scFv-Cys against Tnc that has been incubated in plasma.**

Normal rat plasma (Jackson ImmunoResearch) (200  $\mu$ L) containing scFv-Cys (1.0  $\mu$ g) was prepared in sextuplicate, and each of them was incubated at 37°C for 1, 2, 4, 8, 12, or 24 h. Then, an aliquot (40  $\mu$ g) was taken from the mixture, diluted 25-fold with PBS, and 100  $\mu$ L aliquot of the resulting solution (containing 200 ng/mL scFv, if this remained intact) was incubated in duplicate at 37°C for 1 h in microwells coated with a 10  $\mu$ g/mL Tnc solution as described above. The wells were washed 3 times with T-PBS, and the POD-conjugated anti-FLAG M2 antibody (0.50  $\mu$ g) in T-PBS (100  $\mu$ L) was incubated at 37°C for 1 h. After washing the wells, bound POD activity was determined as described in the text.

#### References (for Supporting Information)

- (1) Imanaka-Yoshida K.; Hiroe M.; Yasutomi Y.; Toyozaki T.; Tsuchiya T.; Noda N.; Maki T.; Nishikawa T.; Sakakura T.; Yoshida T. *J. Pathol.* **2002**, *197*, 388-394.
- (2) Kobayashi N.; Ohtoyo M.; Wada E.; Kato Y.; Mano N.; Goto J. *Steroids* **2005**, *70*, 285-294.
- (3) Kobayashi N.; Oyama H.; Kato Y.; Goto. J.; Söderlind E.; Borrebaeck C. A. K. *Anal. Chem.* **2010**, *82*, 1027-1038.
- (4) Xu H.; Regino C. A. S.; Bernardo M.; Koyama Y.; Kobayashi H.; Choyke P. L.; Brechibiel M. W. *J. Med. Chem.* **2007**, *50*, 3185-3193.
- (5) Kalgutkar A. S.; Crews B. C.; Marnett L. J. *J. Med. Chem.* **1996**, *39*, 1692-1703.
- (6) Cummins C. H.; Rutter Jr E. W.; Fordyce W. A. *Bioconjugate Chem.* **1991**, *2*, 180-186.
- (7) Kabat, E. A.; Wu, T. T.; Perry, H. M.; Gottesman, K. S.; Foeller, C. *Sequences of proteins of immunological interest*; U. S. Department of Health and Human Services, National Institutes of Health, U. S. Government Printing Office: Washington, DC, 1991.
- (8) Guex N.; Diemand A.; Peitsch M. C. *Trends Biochem. Sci.* **1999**, *24*, 364-367.
